# Supplementary material for: Assessment of Pb(II), Cd(II), and Al(III) Removal Capacity of Bacteria from Food and Gut Ecological Niches: Insights into Biodiversity to Limit Intestinal Biodisponibility of Toxic Metals
Source: PubMed Central journal article supplement (PMC7926695; doi:10.3390/microorganisms9020456), 2021-02-22
Supplement: microorganisms-09-00456-s001.pdf [file microorganisms-09-00456-s001.pdf]

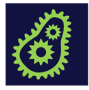

Supplementary file

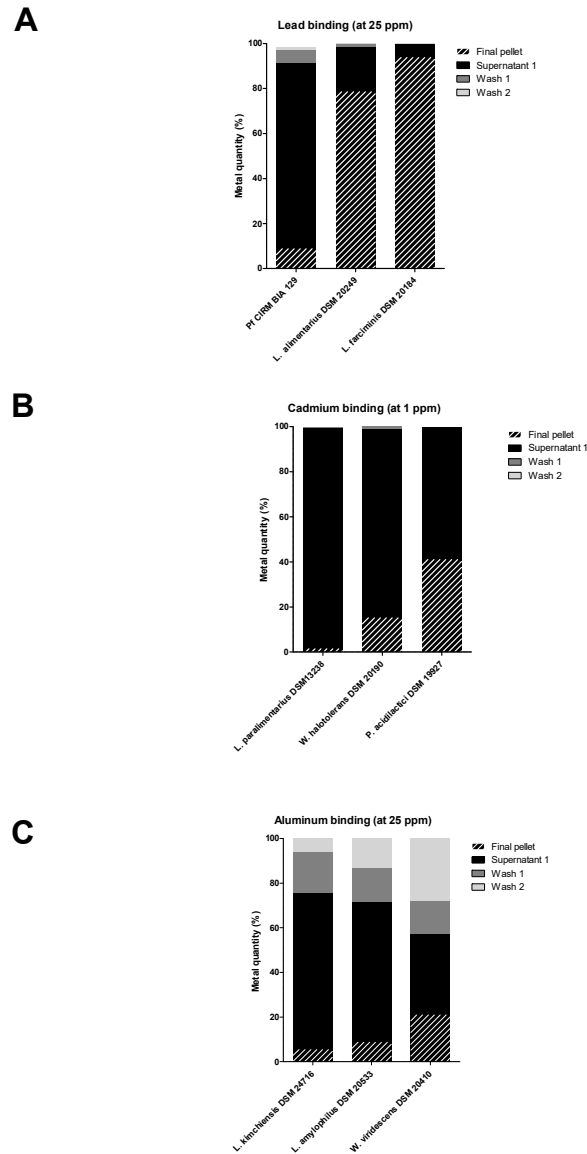

Figure S1: Selected examples of bacterial strains with distinct metal removal capabilities, demonstrating the accuracy of the assays for Pb (A), Cd (B) and Al (C). Metals were quantified in the binding supernatant, in the two washing buffers, and in the final bacterial pellet.

| Strain                             | Cd removal capacity | Cd MIC (ppm) |
|------------------------------------|---------------------|--------------|
| <i>L. mucosae</i> DSM13345         | 5.86%               | 11 ppm       |
| <i>L. ingluviei</i> DSM15946       | 13.08%              | 11 ppm       |
| <i>P. inopinatus</i> DSM20285      | 16.75%              | 11 ppm       |
| <i>L. hordei</i> DSM19519          | 10.63%              | 29 ppm       |
| <i>L. senmaizukei</i> DSM21775     | 3.54%               | 29 ppm       |
| <i>L. paralimentarius</i> DSM13238 | 1.57%               | 34.5 ppm     |
| <i>L. satsumensis</i> DSM16230     | 11.39%              | 34.5 ppm     |
| <i>L. casei</i> DSM20011           | 23.59%              | 34.5 ppm     |
| <i>L. gallinarum</i> DSM10532      | 5.66%               | > 55 ppm     |
| <i>W. confusa</i> DSM20196         | 15.81%              | > 55 ppm     |
| <i>L. hominis</i> DSM23910         | 13.83%              | > 55 ppm     |
| <i>L. acidophilus</i> DSM20079     | 8.06%               | > 55 ppm     |
| <i>L. fructosus</i> DSM20349       | 11.78%              | > 55 ppm     |

Figure S2: Selected examples of bacterial strains with equivalent MICs for Cd but different Cd removal capacities, illustrating the lack of a relationship between metal resistance and metal binding. MICs were determined in 24-hr liquid cultures. The Cd removal capacity is color-coded as weak (0 to 10%: pale green), low (11 to 20%: blue), and moderate (21 to 30%: orange).
